# Supplementary material
Source: HighWire-hosted journal article supplement (http://rc.rcjournal.com/highwire/filestream/17389/field_highwire_adjunct_files/0/suppl.pdf)
Supplement: suppl.pdf [file suppl.pdf]

## **ELETTRONIC SUPPLEMENTARY MATERIAL**

### **EVALUATION OF A NEW INTERFACE COMBINING HIGH FLOW THROUGH NASAL CANNULA AND CONTINUOUS POSITIVE AIRWAY PRESSURE**

Eugenio Garofalo, MD; Andrea Bruni, MD; Corrado Pelaia, MD; Gianmaria Cammarota, MD PhD; Paolo Murabito, MD; Eugenio Biamonte, MD; Karim Abdalla, MD; Federico Longhini, MD; Paolo Navalesi, MD, FERS.

**- Table E1 - Deviation of inspiratory and expiratory pharyngeal pressure from baseline during open and closed mouth breathing conditions**
